# Supplementary material for: Protected Areas and Endemic Freshwater Fishes of the Cape Fold Ecoregion: Missing the Boat for Fish Conservation?
Source: Frontiers journal article supplement (doi:10.3389/fenvs.2020.502042), 2020-12-07
Supplement: Data_Sheet_1.docx [file Data_Sheet_1.docx]

| **Supplementary material: Appendix 1** | | | | | | | | | | |
| --- | --- | --- | --- | --- | --- | --- | --- | --- | --- | --- |
| **Species Name** | **Protected Area** | **PA ID** | **Population Viability Estimate** | **Population Score (PPA)** | **Protected Area Effectiveness Rating** | **Protected Area Effectiveness Score (EPA)** | **Protected Area Total Population Score (PPA x EPA)** | **Notes** | **Confidence level in assesssment per PA** | **Reference** |
| Pseudobarbus burchelli | Langeberg wes mountain catchment reserve | 597 | Viable | 1000 | Poor | 0,1 | 100 | Huis and Tradouw populations:  **Huis River** population impacted by water over-abstraction and the PA does not contribute to protection of the species. | 1 | Jordaan and Chakona, unpublished survey data (2012-2016) |
| Pseudobarbus burchelli | Langeberg wes mountain catchment reserve | 597 | Viable | 1000 | Poor | 0,1 | 100 | Huis and Tradouw populations: **Tradouw River** population impacted by upstream water abstraction and pollution and AIS and the PA does not contribute to protection of the species. | 1 | Jordaan and Chakona, unpublished survey data (2012-2016) |
| Pseudobarbus skeltoni | Hawequas Mountain Catchment Area | 420 | Viable | 1000 | Fair | 0,5 | 500 | Two populations on PA: Population viable but likely small. May be protected from trout invasion by river drying in lower sections for large part of the year. (**Tierkloof**) | 1 | Kadye et al. 2016 |
| Pseudobarbus skeltoni | Haweqwa Nature Reserve | 421 | Non-viable | 100 | Poor | 0,1 | 10 | Two populations on PA: Population not viable as they occurr in very small sections of river. Majority of habitat in reserve invaded by trout & bass and reserve management not focused on conservation of native species. (**Krom River**) | 1 | Kadye et al. 2016 |
| Pseudobarbus skeltoni | Hottentots-Holland Nature Reserve | 451 | Viable | 1000 | Good | 1 | 1000 | Populations viable and river free of AIS. Need to determine poulation size and if instream barrier exists to invasion from downstream. | 1 | Kadye et al. 2016 |
| Galaxias sp nov breede | Matroosberg Mountain Catchment Area | 671 | Non-viable | 100 | Poor | 0,1 | 10 | **Hex River**: Point added manually (Catalog no AC08A19) Majority of available habitat invaded by trout & trout managed for sustainability of trout fishery. | 1 | 2017 RLA |
| Galaxias sp nov breede | Fonteintjiesberg Nature Reserve | 308 | Non-viable | 100 | Poor | 0,1 | 10 | Upper **Jan du Toits** - point added manually (Catalog no AC09D14).Majority of available habitat invaded by trout & trout managed for sustainability of trout fishery. | 1 | 2017 RLA |
| Pseudobarbus burgi | Grootwinterhoek Wilderness Area | 397 | Viable | 1000 | Fair | 0,5 | 500 | **Leeu River** population viable, commercial trout farm present downstream on Leeu river but invasion risk of trout not clear. | 2 | 2017 RLA |
| Pseudobarbus burgi | Hawequas Mountain Catchment Area | 420 | Viable | 1000 | Fair | 0,5 | 500 | Viable populations occur in tributaries upstream of Wemmershoek Dam, seasonally impacted by established trout population in dam. (**Olifants tributary**) | 1 | 2017 RLA |
| Pseudobarbus burgi | Hawequas Mountain Catchment Area | 420 | Viable | 1000 | Fair | 0,5 | 500 | Viable populations occur in tributaries upstream of Wemmershoek Dam, seasonally impacted by established trout population in dam. **(Middle tributary**) | 1 | 2017 RLA |
| Pseudobarbus burgi | Hawequas Mountain Catchment Area | 420 | Viable | 1000 | Fair | 0,5 | 500 | Viable populations occur in tributaries upstream of Wemmershoek Dam, seasonally impacted by established trout population in dam. (**Drakenstein tributary**) | 1 | 2017 RLA |
| Pseudobarbus burgi | Jonkershoek Nature Reserve | 491 | Viable | 1000 | Fair | 0,5 | 500 | Viable population in **upper Berg Rvier** upstream of Berg River Dam, impacted by established trout population | 1 | 2017 RLA |
| Austroglanis barnardi | Winterhoek Mountain Catchment Area | 1171 | Viable | 1000 | Fair | 0,5 | 500 | A viable subpopulation in **Heks Rive**r. Population extends into the Cederbereg Wilderness Area but this was not noted separately to avoid double counting. PL fair as headwaters are protected but invasive spp present. | 1 | Van der Walt, M. Tech thesis, 2014; 2017 RLA |
| Austroglanis barnardi | Winterhoek Mountain Catchment Area | 1171 | Viable | 1000 | Good | 1 | 1000 | A viable subpopulation in the **Thee River**. Headwaters protected & free of bass. | 1 | Van der Walt, M. Tech thesis, 2014; 2017 RLA |
| Austroglanis barnardi | Winterhoek Mountain Catchment Area | 1171 | Viable | 1000 | Good | 1 | 1000 | A viable subpopulation in the **Noordhoeks Rive**r. Headwaters protected & free of bass. | 1 | Van der Walt, M. Tech thesis, 2014; 2017 RLA |
| Austroglanis gilli | Winterhoek Mountain Catchment Area | 1171 | Viable | 1000 | Good | 1 | 1000 | Five viable populations within PA: Heks, Thee, Noordhoeks, Boskloof, Oudste, Ratels. Exclude lower Rondegat population from this PA as intersect a result of inaccurate point data. **(Heks)** Point added manually: Catalog no 75053. | 1 | Van der Walt, M. Tech thesis, 2014; 2017 RLA |
| Austroglanis gilli | Winterhoek Mountain Catchment Area | 1171 | Viable | 1000 | Good | 1 | 1000 | Five viable populations within PA: Heks, Thee, Noordhoeks, Boskloof, Oudste, Ratels. Exclude lower Rondegat population from this PA as intersect a result of inaccurate point data. **(Thee)** | 1 | Van der Walt, M. Tech thesis, 2014; 2017 RLA |
| Austroglanis gilli | Winterhoek Mountain Catchment Area | 1171 | Viable | 1000 | Good | 1 | 1000 | Five viable populations within PA: Heks, Thee, Noordhoeks, Boskloof, Oudste, Ratels. Exclude lower Rondegat population from this PA as intersect a result of inaccurate point data. **(Noordhoeks**) | 1 | Van der Walt, M. Tech thesis, 2014; 2017 RLA |
| Austroglanis gilli | Winterhoek Mountain Catchment Area | 1171 | Viable | 1000 | Good | 1 | 1000 | Five viable populations within PA: Heks, Thee, Noordhoeks, Boskloof, Oudste, Ratels. Exclude lower Rondegat population from this PA as intersect a result of inaccurate point data. (**Boskloof)** Point added manually: Catalog no 128126. | 1 | Van der Walt, M. Tech thesis, 2014; 2017 RLA |
| Austroglanis gilli | Winterhoek Mountain Catchment Area | 1171 | Viable | 1000 | Good | 1 | 1000 | Five viable populations within PA: Heks, Thee, Noordhoeks, Boskloof, Oudste, Ratels. Exclude lower Rondegat population from this PA as intersect a result of inaccurate point data. (**Oudtste)** | 1 | Van der Walt, M. Tech thesis, 2014; 2017 RLA |
| Austroglanis gilli | Winterhoek Mountain Catchment Area | 1171 | Viable | 1000 | Poor | 0,1 | 100 | Five viable populations within PA: Heks, Thee, Noordhoeks, Boskloof, Oudste, Ratels. Exclude lower Rondegat population from this PA as intersect a result of inaccurate point data. **(Ratels).**  Lower PL value for Ratels as headwaters unprotected and very small section of river in PA | 2 | Van der Walt, M. Tech thesis, 2014; 2017 RLA |
| Austroglanis gilli | Koue Bokkeveld Mountain Catchment Area | 566 | Viable | 1000 | Good | 1 | 1000 | Viable populations in **Breekkrans** river upstream of bass barrier. | 1 | Van der Walt, M. Tech thesis, 2014; 2017 RLA |
| Austroglanis gilli | Cederberg Mountain Catchment Area | 176 | Viable | 1000 | Poor | 0,1 | 100 | Two pops in PA. Middle/upper Jan Dissels with catlets downstream of the bass barrier. **(Jan Dissels)** | 1 | Van der Walt, M. Tech thesis, 2014; 2017 RLA |
| Austroglanis gilli | Cederberg Mountain Catchment Area | 176 | Viable | 1000 | Fair | 0,5 | 500 | Two pops in PA. Krom River population where trout is present upstream of A. gilli. **(Krom)** | 1 | SAIAB unpublished Krom river monitoring data (Weyl and Marr, 2017) |
| Austroglanis gilli | Matjiesrivier Nature Reserve | 668 | Viable | 1000 | Fair | 0,5 | 500 | Viable populations in **Driehoeks** river. PL moderate due to presence of bass. | 2 | Van der Walt, M. Tech thesis, 2014; 2017 RLA |
| Austroglanis gilli | Cederberg Wilderness Area | 179 | Viable | 1000 | Good | 1 | 1000 | Viable populations in upper Jan Dissels upstream of bass barrier and upper Rondegat river. (**Jan Dissels**) | 1 | Van der Walt, M. Tech thesis, 2014; 2017 RLA |
| Austroglanis gilli | Cederberg Wilderness Area | 179 | Viable | 1000 | Good | 1 | 1000 | Viable populations in upper Jan Dissels upstream of bass barrier and upper Rondegat river. **(Upper Rondega**t) | 1 | Van der Walt, M. Tech thesis, 2014; 2017 RLA WRC monitoring report (Weyl et al) |
| Austroglanis gilli | Dwarsrivier | 261 | Viable | 1000 | Good | 1 | 1000 | Manually added, RLA refers to **Dwars River** population but no point to add to map - ask Riaan for distribution point. PL rated fair due to uncertainty | 1 | Van der Walt, M. Tech thesis, 2014; 2017 RLA |
| Pseudobarbus andrewi | Riviersonderend Nature Reserve | 892 | Non-viable | 100 | Poor | 0,1 | 10 | **Mainstream Riviersonderend** River dominated by AIS, PA does not contribute to protection of species. | 1 | Sean Marr, unpublished data, 2016; 2017 RLA |
| Labeo seeberi | Matjiesrivier Nature Reserve | 668 | Viable | 1000 | Fair | 0,5 | 500 | Viable population in lower **Matjies River**, upstream areas impact by black bass. | 1 | Van der Walt, M. Tech thesis, 2014 |
| Labeo seeberi | Oorlogskloof Provincial Nature Reserve | 794 | Viable | 1000 | Fair | 0,5 | 500 | Viable population in **Oorlogskloof River,** impacted by banded tilapia invasion and river open to invasion from upstream sources outside PA. | 1 | Schumann et al., Unpublished OKNR survey data, 2010 - 2018 |
| Pseudobarbus erubescens | Koue Bokkeveld Mountain Catchment Area | 566 | Viable | 1000 | Good | 1 | 1000 | Includes headwater of Suurvlei, lower Middeldeur and lower Twee River. Suurvlei protected but small redfin population - point addded maually (RvdW-20). Intersect points on Middeldeur excluded (Catalog no 1799 &1866) - not protected by PA as it does not include the river. Twee River: Very small section of river intersect wiht PA & Extralimital species established and dominant in mainstream Twee River. Extensive landuse impacts from agriculture. (**Suurvlei)** | 2 | Marr et al. 2010 paper; Brink et al, unpublished data, 2016 |
| Pseudobarbus erubescens | Koue Bokkeveld Mountain Catchment Area | 566 | Non-viable | 100 | Poor | 0,1 | 10 | Includes headwater of Suurvlei, lower Middeldeur and lower Twee River. Suurvlei protected but small redfin population - point addded maually (RvdW-20). Intersect points on Middeldeur excluded (Catalog no 1799 &1866) - not protected by PA as it does not include the river. Twee River: Very small section of river intersect wiht PA & Extralimital species established and dominant in mainstream Twee River. Extensive landuse impacts from agriculture. (**Mainstem Twee)** | 2 | Marr et al. 2010 paper; Brink et al, unpublished data, 2017 |
| Pseudobarbus erubescens | Wagenboom Nature Reserve | 1137 | Viable | 1000 | Good | 1 | 1000 | Small but viable population in upper Middeldeur River upstream of invasion barrier. No known land use or water over-abstraction impacts. (Marr et al. 2010). (**Middeldeur**) | 1 | Marr et al. 2010; Van der Walt, M. Tech thesis, 2014; Brink et al, unpublished data, 2016 |
| Pseudobarbus erubescens | Winterhoek Mountain Catchment Area | 1171 | Viable | 1000 | Good | 1 | 1000 | Small but viable population in Heks River upstream of invasion barrier. No known land use or water over-abstraction impacts. (**Heks**) | 1 | Marr et al. 2010; Van der Walt, M. Tech thesis, 2014; Brink et al, unpublished data, 2016 |
| Pseudobarbus erubescens | Winterhoek Mountain Catchment Area | 1171 | Viable | 1000 | Fair | 0,5 | 500 | **Tuinskloof Dam population.** Viable and large but protection moderate due to private ownership of dam increasing risk of invasive fish introductions. | 1 | Jordaan et al. 2016 paper |
| Pseudobarbus phlegethon | Cederberg Wilderness Area | 179 | Viable | 1000 | Good | 1 | 1000 | Two pops on PA, Rondegat and Boskloof Rivers, both viable poplations upstream of bass barriers. (**Rondegat)** | 1 | Van der Walt, M. Tech thesis, 2014 |
| Pseudobarbus phlegethon | Cederberg Wilderness Area | 179 | Viable | 1000 | Good | 1 | 1000 | Two pops on PA, Rondegat and Boskloof Rivers, both viable poplations upstream of bass barriers. **(Boskloof**) | 1 | Van der Walt, M. Tech thesis, 2014 |
| Pseudobarbus phlegethon | Winterhoek Mountain Catchment Area | 1171 | Viable | 1000 | Good | 1 | 1000 | Three pops on PA. Lower Rondegat intersect (Cat no 58327) excluded due to mapping inaccuracy, remaining three in Thee, Oudste and Noordhoeks Rivers, all viable. **(Thee**) | 1 | Van der Walt, M. Tech thesis, 2014 |
| Pseudobarbus phlegethon | Winterhoek Mountain Catchment Area | 1171 | Viable | 1000 | Good | 1 | 1000 | Three pops on PA. Lower Rondegat intersect (Cat no 58327) excluded due to mapping inaccuracy, remaining three in Thee, Oudste and Noordhoeks Rivers, all viable. (**Oudtste**) | 1 | Van der Walt, M. Tech thesis, 2014 |
| Pseudobarbus phlegethon | Winterhoek Mountain Catchment Area | 1171 | Viable | 1000 | Good | 1 | 1000 | Three pops on PA. Lower Rondegat intersect (Cat no 58327) excluded due to mapping inaccuracy, remaining three in Thee, Oudste and Noordhoeks Rivers, all viable. (**Noordhoeks**) | 1 | Van der Walt, M. Tech thesis, 2014 |
| Pseudobarbus sp nov Doring | Cederberg Wilderness Area | 179 | Viable | 1000 | Good | 1 | 1000 | Upper **Driehoeks Rive**r has a viable population based on the RLA. | 1 | 2017 RLA |
| Pseudobarbus sp nov Doring | Koue Bokkeveld Mountain Catchment Area | 566 | Viable | 1000 | Good | 1 | 1000 | Small population present upstream of bass barrier **(Breekkrans**/Brandkraal River) | 1 | Van der Walt, M. Tech thesis, 2014; 2017 RLA |
| Pseudobarbus asper | Anysberg Nature Reserve | 33 | Viable | 1000 | Fair | 0,5 | 500 | Two viable populations (Buffels and Touwsrivier). Protection fair as catchment upstream of PA not protected, open to invasion by AIS. Excluded intersects as as result of incorrect/inaccurate points: PA ID: 535 Catalog no: 135500, 125282 **(Buffels)** | 1 | Jordaan and Gouws 2015, (internal CN report: Anysberg NR fish survey 2015) |
| Pseudobarbus asper | Anysberg Nature Reserve | 33 | Viable | 1000 | Fair | 0,5 | 500 | Two viable populations (Buffels and Touwsrivier). Protection fair as catchment upstream of PA not protected, open to invasion by AIS. Excluded intersects as as result of incorrect/inaccurate points: PA ID: 535 Catalog no: 135500, 125282 (**Touws);** PA ID: 332 (catalog no 119771) | 1 | Jordaan and Gouws 2015, (internal CN report: Anysberg NR fish survey 2015) |
| Pseudobarbus asper | Paardenberg Nature Reserve | 809 | Viable | 1000 | Fair | 0,5 | 500 | **Huis river** on Paardenberg NR: Population status uncertain, need surveys. Population could be impacted by bass invasion from Gamka River. Site surveyed downstream in 2015 but no redfins detected. Having a PA on both sides of the river protects against land use related impacts. | 3 | Jordaan et al. 2015, 2016 (Internal CN reports: Gamkaberg and Swartberg NR fish surveys) |
| Pseudobarbus asper | Groot Swartberg Nature Reserve | 385 | Viable | 1000 | Good | 1 | 1000 | Three subpopulations in PA, Waterkloof/Huis and Oshoekshang - small populations but likely viable. Hoeks populations also viable but impacted by trout. No known impacts onWaterkloof/Huis and Oshoekshang. (**Waterkloof)** | 2 | Jordaan et al. 2015, 2016 (Internal CN reports: Gamkaberg and Swartberg NR fish surveys) |
| Pseudobarbus asper | Groot Swartberg Nature Reserve | 385 | Viable | 1000 | Good | 1 | 1000 | Three subpopulations in PA, Waterkloof/Huis and Oshoekshang - small populations but likely viable. Hoeks populations also viable but uimpacted by trout. No known impacts onWaterkloof/Huis and Oshoekshang. (**Oshoekshang)** | 2 | Jordaan et al. 2015, 2016 (Internal CN reports: Gamkaberg and Swartberg NR fish surveys) |
| Pseudobarbus asper | Groot Swartberg Nature Reserve | 385 | Viable | 1000 | Fair | 0,5 | 500 | Three subpopulations in PA, Waterkloof/Huis and Oshoekshang - small populations but likely viable. Hoeks populations also viable but impacted by trout. No known impacts onWaterkloof/Huis and Oshoekshang. **(Hoeks)** | 2 | Jordaan et al. 2015, 2016 (Internal CN reports: Gamkaberg and Swartberg NR fish surveys); Tom Barry, pers comm. |
| Pseudobarbus asper | Grootswartberg Mountain Catchment Area | 393 | Viable | 1000 | Fair | 0,5 | 500 | Subpopulation in **Groot River** (Meiringspoort). Largest P. asper population in a PA. Open to invasion from AIS from upstream and land anthropogenic impacts due to main road (N12) passing along river PA. | 1 | Jordaan et al. 2015, 2016 (Internal CN reports: Gamkaberg and Swartberg NR fish surveys); Jordaan 2018: post diesel spill monitoring reports. |
| Pseudobarbus asper | Swartberg East Nature Reserve | 1016 | Viable | 1000 | Fair | 0,5 | 500 | Subpopulation in **Groot River** (Meiringspoort). Largest P. asper population in a PA. Open to invasion from AIS from upstream and land anthropogenic impacts due to main road (N12) passing along river PA. | 1 | Jordaan and Gouws 2017, internal CN report: Swartberg NR fish survey 2016 |
| Pseudobarbus asper | Baviaanskloof Nature Reserve | 1244 | Viable | 1000 | Fair | 0,5 | 500 | Three datapoints in PA, one needs georeferencing. Two populations in Groot and Skrik Rivers. **Skrik (tributary of Kouga)**: PL listed as fair as datapoint is in headwaters within PA but no data to support. | 3 | No current data, urgently need surveys |
| Pseudobarbus asper | Baviaanskloof Nature Reserve | 1244 | Viable | 1000 | Poor | 0,1 | 100 | Three datapoints in PA, one needs georeferencing. Two populations in Groot and Skrik Rivers. **Groot River:** PL listed as poor as AIS invasion is causing major population decline. | 1 | 2007 RLA, need surveys to update information |
| Pseudobarbus calidus | Cederberg Mountain Catchment Area | 176 | Non-viable | 100 | Poor | 0,1 | 10 | **Lower Jan Dissels**: Population not viable & poorly protected, AIS (bass) well established in lower Jan Dissels River below bass barrier. | 1 | Van der Walt, M. Tech thesis, 2014 |
| Pseudobarbus calidus | Cederberg Wilderness Area | 179 | Viable | 1000 | Good | 1 | 1000 | Viable populations in upper Jan Dissels, upper Rondegat and Upper Heks rivers upstream of bass barriers. (**Rondegat**) | 1 | WRC monitoring report for Rondegat River & Van der Walt, M. Tech thesis, 2014 |
| Pseudobarbus calidus | Cederberg Wilderness Area | 179 | Viable | 1000 | Good | 1 | 1000 | Viable populations in upper Jan Dissels, upper Rondegat and Upper Heks rivers upstream of bass barriers. (**Jan Dissels**) | 1 | Van der Walt, M. Tech thesis, 2014, 2017 RLA |
| Pseudobarbus calidus | Cederberg Wilderness Area | 179 | Viable | 1000 | Good | 1 | 1000 | Viable populations in upper Jan Dissels, upper Rondegat and Upper Heks rivers upstream of bass barriers. (**Heks**) | 1 | Van der Walt, M. Tech thesis, 2014 |
| Pseudobarbus calidus | Koue Bokkeveld Mountain Catchment Area | 566 | Viable | 1000 | Good | 1 | 1000 | Viable population in upper **Breekkrans/Brandkraal** upstream of bass barrier. | 1 | Van der Walt, M. Tech thesis, 2014 |
| Pseudobarbus calidus | Matjiesrivier Nature Reserve | 668 | Viable | 1000 | Good | 1 | 1000 | Viable population in lower **Matjies River**, upstream areas impact by black bass. | 1 | Van der Walt, M. Tech thesis, 2014 |
| Pseudobarbus calidus | Winterhoek Mountain Catchment Area | 1171 | Viable | 1000 | Good | 1 | 1000 | Viable populations in Dwars, Diepkloof, Thee, Oudtste, Boskloof, Noordhoeks rivers upstream of bass barriers. Boontjies excluded as points very far downsteam of PA.**(Dwars**) | 1 | Van der Walt, M. Tech thesis, 2014 |
| Pseudobarbus calidus | Winterhoek Mountain Catchment Area | 1171 | Viable | 1000 | Good | 1 | 1000 | Viable populations in Dwars, Diepkloof, Thee, Oudtste, Boskloof, Noordhoeks rivers upstream of bass barriers. Boontjies excluded as points very far downsteam of PA.**(Diepkloof**) | 1 | Van der Walt, M. Tech thesis, 2014 |
| Pseudobarbus calidus | Winterhoek Mountain Catchment Area | 1171 | Viable | 1000 | Good | 1 | 1000 | Viable populations in Dwars, Diepkloof, Thee, Oudtste, Boskloof, Noordhoeks rivers upstream of bass barriers. Boontjies excluded as points very far downsteam of PA.**(Thee**) | 1 | Van der Walt, M. Tech thesis, 2014 |
| Pseudobarbus calidus | Winterhoek Mountain Catchment Area | 1171 | Viable | 1000 | Good | 1 | 1000 | Viable populations in Dwars, Diepkloof, Thee, Oudtste, Boskloof, Noordhoeks rivers upstream of bass barriers. Boontjies excluded as points very far downsteam of PA.**(Noordhoeks**) | 1 | Van der Walt, M. Tech thesis, 2014 |
| Pseudobarbus calidus | Winterhoek Mountain Catchment Area | 1171 | Viable | 1000 | Good | 1 | 1000 | Viable populations in Dwars, Diepkloof, Thee, Boontjies, Boskloof, Noordhoeks rivers upstream of bass barriers. (**Boskloof**). Point added manually: Catalog no: 8963. River extends to PA 179 but not listed there to avoid double counting | 1 | Van der Walt, M. Tech thesis, 2014 |
| Pseudobarbus calidus | Winterhoek Mountain Catchment Area | 1171 | Viable | 1000 | Good | 1 | 1000 | Viable populations in Dwars, Diepkloof, Thee, Oudtste, Boskloof, Noordhoeks rivers upstream of bass barriers. Boontjies excluded as points very far downsteam of PA.**(Oudtste**). Point added manuaaly: Catalog no 1393, RvW records confirm presence in PA | 1 | Van der Walt, M. Tech thesis, 2014 |
| Pseudobarbus serra | Cederberg Wilderness Area | 179 | Viable | 1000 | Good | 1 | 1000 | Viable populations in upper Jan Dissels river upstream of bass barriers. | 1 | Van der Walt, M. Tech thesis, 2014 |
| Pseudobarbus serra | Dwarsrivier | 261 | Viable | 1000 | Fair | 0,5 | 500 | Viable population in upper Driehoeks-Matjies system, bass present which is adversely affecting native species but population remains viable. | 2 | Van der Walt, M. Tech thesis, 2014 |
| Pseudobarbus serra | Groot Winterhoek Protected Environment | 386 | Viable | 1000 | Fair | 0,5 | 500 | Viable population in upper Olifants river upstream of bass barriers but open to invasion from upstream sources as upper catchment is outside PA. | 1 | Van der Walt, M. Tech thesis, 2014 |
| Pseudobarbus serra | Matjiesrivier Nature Reserve | 668 | Viable | 1000 | Fair | 0,5 | 500 | Viable population in lower Driehoeks-Matjies system, bass present which is adversely affecting native species but population remains viable. | 1 | Van der Walt, M. Tech thesis, 2014 |
| Pseudobarbus serra | Oorlogskloof Provincial Nature Reserve | 794 | Viable | 1000 | Fair | 0,5 | 500 | Viable population in Oorlogskloof River, impacted by banded tilapia invasion and river open to invasion from upstream sources outside PA. | 1 | Schumann et al., Unpublished OKNR survey data, 2010 - 2018 |
| Pseudobarbus serra | Winterhoek Mountain Catchment Area | 1171 | Viable | 1000 | Good | 1 | 1000 | Viable populations in Dwars, Ratels and upper Olifants. Olifants headwaters open to invasion from upstream sources as upper catchment is outside PA. Ratels excluded as it is mostly outside PA. Dwars population upstream of bass barrier (**Dwars**) | 1 | Van der Walt, M. Tech thesis, 2014 |
| Pseudobarbus serra | Winterhoek Mountain Catchment Area | 1171 | Viable | 1000 | Fair | 0,5 | 500 | Viable populations in Dwars, Ratels and upper Olifants. Olifants headwaters open to invasion from upstream sources as upper catchment is outside PA. Ratels mostly unprotected as it is outside PA. (**upper Olifants**) | 1 | Van der Walt, M. Tech thesis, 2014 |
| Galaxias sp nov Klein | Groot Hagelkraal Private Nature Reserve | 383 | Viable | 1000 | Fair | 0,5 | 500 | **Haelkraal River**: Fair PL assigned due to paucity of information | 2 | Chakona et al. 2013; 2017 RLA |
| Galaxias sp nov Klein | Agulhas National Park Agulhas Pearly Beach Section | 12 | Viable | 1000 | Fair | 0,5 | 500 | Point added manually: Catalog no. AC09A30. Presence in **upper Haelkraal** inferred from donwstream distribution records. Fair PL assigned due to paucity of information | 2 | Chakona et al. 2013; 2017 RLA |
| Galaxias sp nov Riviersonerend | Greyton Local Nature Reserve | 374 | Viable | 1000 | Fair | 0,5 | 500 | **Gobos River** and tributary. Present in low numbers. Clarias invasion detected in 2013. | 1 | Unpublished Breede RHP report (2009); Jordaan unpublished data Riversonderend NR fish survey (2013, 2014) |
| Galaxias sp nov Riviersonerend | Hottentots-Holland Nature Reserve | 451 | Viable | 1000 | Fair | 0,5 | 500 | Two populations on PA, Viable population in lower Du Toits River, upstream bass presence limited impact on galaxias 2nd population in upper Palmiet. Invasives present  **(du Toits)** | 3 | Bass detected in Du Toits River during 2009 RHP survey (upstream of galaxias distribution point). |
| Galaxias sp nov Riviersonerend | Hottentots-Holland Nature Reserve | 451 | Viable | 1000 | Good | 1 | 1000 | Two populations on PA, Viable population in lower Du Toits River, upstream bass presence limited impact on galaxias 2nd population in upper Palmiet. Invasives present (**Palmiet**) | 2 | Chakona, unpublished PhD data |
| Galaxias sp nov Riviersonerend | Riviersonderend Nature Reserve | 892 | Viable | 1000 | Fair | 0,5 | 500 | **Meul River** - Viable population detected in 2014 during reserve fish survey. Future invasion risk by *Clarias* and other invasive spp, therefore PL only fair. | 1 | Jordaan unpublished data Riversonderend NR fish survey (2013, 2014) |
| Galaxias sp nov Riviersonerend | Theewaters Nature Reserve | 1051 | Viable | 1000 | Fair | 0,5 | 500 | **Amandel River:** impacts limited but river open to invasion to alien fish from TWK Dam | 2 | Chakona, unpublished PhD data |
| Labeobarbus seeberi | Cederberg Wilderness Area | 179 | Viable | 1000 | Good | 1 | 1000 | Viable populations in Rondegat and Jan Dissels upstream of bass bariers. Very small section of Jan Dissels protected between bass barrier and fish upper limits, most of reserve invaded by bass. Occurrence records in Boskloof, not sure if these extend into PA. Eselbank river population excluded as fish upper limit downstream of PA. Jan Dissels: Manual datapoint from Riaan (**Rondegat**) | 2 | Van der Walt, M. Tech thesis, 2014 |
| Labeobarbus seeberi | Cederberg Wilderness Area | 179 | Viable | 1000 | Fair | 0,5 | 500 | Viable populations in Rondegat, Jan Dissels upstream of bass bariers. Very small section of Jan Dissels protected between bass barrier and fish upper limits, most of reserve invaded by bass. Occurrence records in Boskloof, not sure if these extend into PA. Eselbank river population excluded as fish upper limit downstream of PA. Jan Dissels: Manual datapoint from Riaan (**Rondegat**) | 1 | Van der Walt, M. Tech thesis, 2014, SAIAB WRC Report |
| Labeobarbus seeberi | Cederberg Wilderness Area | 179 | Viable | 1000 | Fair | 0,5 | 500 | Viable populations in Rondegat and Jan Dissels upstream of bass bariers. Very small section of Jan Dissels protected between bass barrier and fish upper limits, most of reserve invaded by bass. Occurrence records in Boskloof, not sure if these extend into PA. Eselbank river population excluded as fish upper limit downstream of PA. Jan Dissels: Manual datapoint from Riaan **(Jan Dissels** - lower PL value due to short stretch of uninvaded river in PA). | 1 | Van der Walt, M. Tech thesis, 2014, RLA |
| Labeobarbus seeberi | Cederberg Wilderness Area | 179 | Viable | 1000 | Good | 1 | 1000 | Viable populations in Rondegat and Jan Dissels upstream of bass bariers. Very small section of Jan Dissels protected between bass barrier and fish upper limits, most of reserve invaded by bass. Occurrence records in Boskloof, not sure if these extend into PA. Eselbank river population excluded as fish upper limit downstream of PA. Jan Dissels: Manual datapoint from Riaan (**Boskloof**) | 1 | Van der Walt, M. Tech thesis, 2014, RLA |
| Labeobarbus seeberi | Groot Winterhoek Protected Environment | 386 | Viable | 1000 | Fair | 0,5 | 500 | **Headwaters of Olifants** outside PA and vulnerable to alien fish invasion and land use impacts, therefore protection only moderate. Black bass present downstream but large section of river upstream of bass barrier. | 1 | Van der Walt, M. Tech thesis, 2014, |
| Labeobarbus seeberi | Koue Bokkeveld Mountain Catchment Area | 566 | Non-viable | 100 | Poor | 0,1 | 10 | Populations in Leeu-Groot and lower Twee river. Twee population extralimital but translocation made for conservation purposes. Both points added manually from Riaan's work. Poor protection for **Twee River** population as PA is located downstream of bass barrier & possible agrichemical pollution from unprotected upstream areas. | 1 | Van der Walt, M. Tech thesis, 2014, |
| Labeobarbus seeberi | Koue Bokkeveld Mountain Catchment Area | 566 | Viable | 1000 | Fair | 0,5 | 500 | Protection rated fair for **Leeu-Groot** as headwaters located outside PA, likely water abstractions issues upstream. | 3 | Need surveys to update data |
| Labeobarbus seeberi | Matjiesrivier Nature Reserve | 668 | Viable | 1000 | Fair | 0,5 | 500 | Viable population present in **Matjies-Driehoeks** river in PA, only moderate protection as there are some bass present in river. | 2 | Van der Walt, M. Tech thesis, 2014, |
| Labeobarbus seeberi | Winterhoek Mountain Catchment Area | 1171 | Viable | 1000 | Good | 1 | 1000 | Noordhoek, Thee, Dwars rivers with viable populations. Ratel Rvier excluded as fish upper limit on PA boundary. Thee Rvier point added manually (126812) (**Noordhoek**) | 2 | 2017 RLA |
| Labeobarbus seeberi | Winterhoek Mountain Catchment Area | 1171 | Viable | 1000 | Good | 1 | 1000 | Noordhoek, Thee, Dwars rivers with viable populations. Ratel Rvier excluded as fish upper limit on PA boundary. Thee Rvier point added manually (126812) (**Thee**) | 2 | 2017 RLA |
| Labeobarbus seeberi | Winterhoek Mountain Catchment Area | 1171 | Viable | 1000 | Fair | 0,5 | 500 | Noordhoek, Thee, Dwars rivers with viable populations. Ratel Rvier excluded as fish upper limit on PA boundary. Thee Rvier point added manually (126812) (**Dwars**) | 1 | 2017 RLA |
| Labeobarbus seeberi | Oorlogskloof Provincial Nature Reserve | 794 | Viable | 1000 | Fair | 0,5 | 500 | **Oorlogskloof/Kobee Rvier:** Point added manualy form downstream distribution (Catalog no 128395). Protection fair as headwaters unprotected & banded tilapia invasion on native fihs zone | 1 | Schumann et al., Unpublished OKNR survey data, 2010 - 2018 |
| Pseudobarbus sp nov 'Breede' | Greyton Local Nature Reserve | 374 | Viable | 1000 | Fair | 0,5 | 500 | **Gobos River**: Fair rating as there is a Clarias gariepinus invasion in the river but good redfin numbers still persist (Jordaan, unpublished data). | 1 | Jordaan, unpublished data |
| Pseudobarbus sp nov 'Breede' | Riviersonderend Nature Reserve | 892 | Viable | 1000 | Fair | 0,5 | 500 | Three populations on PA: Points added manually as no intersect (upper Gobos and Meul rivers). Presence inferred in **upper Gobos** as records exist downstream (Catalog number 201018). PL fair as Clarias present donwstream. | 1 | Jordaan, unpublished data |
| Pseudobarbus sp nov 'Breede' | Riviersonderend Nature Reserve | 892 | Viable | 1000 | Good | 1 | 1000 | Three populations on PA: Points added manually as no intersect (upper Gobos and Meul rivers). Viable population in **Meul River** (Catalog number 194598). PA serves to protect against land use impacts and headwaters are protected. Refers to section ID 2169 &2168. | 1 | Jordaan, unpublished data |
| Pseudobarbus sp nov 'Breede' | Riviersonderend Nature Reserve | 892 | Viable | 1000 | Good | 1 | 1000 | Three populations on PA: **Elandskloof River** point added manually as intersect is on PA 891 but majority of river on this PA. (Catalog number 201051). PA serves to protect against land use impacts and headwaters are protected. | 1 | Chakona et al., 2013 - supplementary data |
| Pseudobarbus sp nov 'Breede' | Riviersonderend Mountain Catchment Area | 891 | Viable | 1000 | Good | 1 | 1000 | Three populations on PA: Baviaans, Hoeks and Boesmans Rivers. **Baviaans** well protected as two instream invasion barriers exist just upstream of Genadendal town. Population viable and no alien invasive fish, headwaters protected (Jordaan, unpublished data). | 1 | Jordaan, unpublished data |
| Pseudobarbus sp nov 'Breede' | Riviersonderend Mountain Catchment Area | 891 | Viable | 1000 | Good | 1 | 1000 | Three populations on PA: Baviaans, Hoeks and Boesmans Rivers. **Hoeks River**: small but viable populaion upstream of SWA weir, water abstraction and AIS donwstream (Jordaan, unpublished data). | 1 | Jordaan, unpublished data |
| Pseudobarbus sp nov 'Breede' | Hawequas Mountain Catchment Area | 420 | Viable | 1000 | Good | 1 | 1000 | **Steenboks tributary**: Viable population upstream of bass barrier | 1 | Chakona et al., 2013 - supplementary data |
| Pseudobarbus sp nov 'Breede' | Haweqwa Nature Reserve | 421 | Viable | 1000 | Good | 1 | 1000 | **Witte River**: Viable population upstream of bass barrier | 1 | Shelton et al., 2014_bainskloof bass paper |
| Pseudobarbus sp nov 'Breede' | Hottentots-Holland Nature Reserve | 451 | Viable | 1000 | Good | 1 | 1000 | Two populations on PA: **Upper Riviersonderend River:** Viable population and no alien fish present. | 1 | Kadyet et al. 2016_Ecology and Evolution paper |
| Pseudobarbus sp nov 'Breede' | Hottentots-Holland Nature Reserve | 451 | Viable | 1000 | Good | 1 | 1000 | Two populations on PA: **Jan du Toits River**: Point added manually: AC09D16Viable population upstream of bass barrier, headwaters protected. and no alien fish present. | 1 | Chakona et al., 2013 |
| Pseudobarbus sp nov 'Breede' | Marloth Nature Reserve | 662 | Viable | 1000 | Good | 1 | 1000 | Three populations on PA: Leeu, Mardouw and Keurbooms. Viable population sampled in **Leeu River** in 2008 RHP survey, not sure of current status of population | 2 | Unpublished RHP report |
| Pseudobarbus sp nov 'Breede' | Marloth Nature Reserve | 662 | Viable | 1000 | Good | 1 | 1000 | Three populations on PA: Leeu, Mardouw and Keurbooms. Viable population in **Keurbooms River.** Point added manually AC09C74. | 1 | Unpublished RHP report |
| Pseudobarbus sp nov 'Breede' | Marloth Nature Reserve | 662 | Viable | 1000 | Good | 1 | 1000 | Manual addition for Marloth NR. Catalog number: 121241. **Mardouw River** surveyed in 2016, viable population upstream of instream weir. | 1 | Jordaan, CapeNature internal field report |
| Pseudobarbus sp nov 'Breede' | Matroosberg Mountain Catchment Area | 671 | Viable | 1000 | Fair | 0,5 | 500 | Multiple populations present on PA but limited protection due to widespread trout presence. These include Hartbees, Jan du Toits, Hex, Sanddrif and Amandels rivers all impacted by trout. Also Die Brak (catalog no 201099) River impacted by trout, redfin population status unknown. PA protects against land use impacts such as destriction of habitat but not against alien fish impacts. (**Hartbees**) | 1 | Unpublished Breede River RHP report, 2009; A. Chakona, unpublished data. |
| Pseudobarbus sp nov 'Breede' | Matroosberg Mountain Catchment Area | 671 | Viable | 1000 | Fair | 0,5 | 500 | Multiple populations present on PA but limited protection due to widespread trout presence. These include Hartbees, Jan du Toits, Hex, Sanddrif and Amandels rivers all impacted by trout. Also Die Brak (catalog no 201099) River impacted by trout, redfin population status unknown. PA protects against land use impacts such as destriction of habitat but not against alien fish impacts. **(Jan du Toits** - stocked with trout) | 2 | Trout stocking permits; 2017 RLA |
| Pseudobarbus sp nov 'Breede' | Matroosberg Mountain Catchment Area | 671 | Viable | 1000 | Poor | 0,1 | 100 | Multiple populations present on PA but limited protection due to widespread trout presence. These include Hartbees, Jan du Toits, Hex, Sanddrif and Amandels rivers all impacted by trout. Also Die Brak (catalog no 201099) River impacted by trout, redfin population status unknown. PA protects against land use impacts such as destriction of habitat but not against alien fish impacts. **(Hex** - small section in reserve, thus limited protection from PA) | 1 | RHP surveys - 2009 |
| Pseudobarbus sp nov 'Breede' | Matroosberg Mountain Catchment Area | 671 | Viable | 1000 | Fair | 0,5 | 500 | Multiple populations present on PA but limited protection due to widespread trout presence. These include Hartbees, Jan du Toits, Hex, Sanddrif and Amandels rivers all impacted by trout. Also Die Brak (catalog no 201099) River impacted by trout, redfin population status unknown. PA protects against land use impacts such as destriction of habitat but not against alien fish impacts. **(Sanddrif**) | 1 | RHP surveys - 2009 |
| Pseudobarbus sp nov 'Breede' | Matroosberg Mountain Catchment Area | 671 | Viable | 1000 | Fair | 0,5 | 500 | Multiple populations present on PA but limited protection due to widespread trout presence. These include Hartbees, Jan du Toits, Hex, Sanddrif and Amandels rivers all impacted by trout. Also Die Brak (catalog no 201099) River impacted by trout, redfin population status unknown. PA protects against land use impacts such as destriction of habitat but not against alien fish impacts. (**Amandels**) | 1 | RHP surveys - 2009 |
| Pseudobarbus sp nov 'Breede' | Matroosberg Mountain Catchment Area | 671 | Viable | 1000 | Poor | 0,1 | 100 | Multiple populations present on PA but limited protection due to widespread trout presence. These include Hartbees, Jan du Toits, Hex, Sanddrif and Amandels rivers all impacted by trout. Also Die Brak (catalog no 201099) River impacted by trout, redfin population status unknown. PA protects against land use impacts such as destriction of habitat but not against alien fish impacts. (**Die Brak**: most of the river outside PA) | 3 | no data, need surveys |
| Pseudobarbus sp nov 'Breede' | Montagu Mountain | 710 | Non-viable | 100 | Poor | 0,1 | 10 | **Lower Keisie and Kogmanskloof river**s: Population viability to be confirmed. Check with Albert? PL rated low as headwaters unprotected and AIS present in lower river. | 2 | Redfins possibly extirpated - 2009 RHP surveys |
| Pseudobarbus sp nov 'Breede' | Theewaters Nature Reserve | 1051 | Viable | 1000 | Fair | 0,5 | 500 | Amandel River: possibly affected by invasion from AIS from Theewaterskloof Dam | 1 | Unpublished RHP report, A. Chakona, unpublished data. |
| Pseudobarbus tenuis | Towerkop Nature Reserve | 1065 | Viable | 1000 | Good | 1 | 1000 | Dwars and Seweweekspoort Rivers. Both populations viable and no alien fish detected. Headwaters also protected for Dwars River. **(Dwars)** | 1 | Jordaan& Chakona: Biogaps/Swartberg NR survey 2016 |
| Pseudobarbus tenuis | Towerkop Nature Reserve | 1065 | Viable | 1000 | Good | 1 | 1000 | Dwars and Seweweekspoort Rivers. Both populations viable and no alien fish detected. Headwaters also protected for Dwars River. (**Seweweekspoort**) | 1 | Jordaan& Chakona: Biogaps/Swartberg NR survey 2016 |
| Pseudobarbus tenuis | Swartberg East Nature Reserve | 1016 | Viable | 1000 | Fair | 0,5 | 500 | Nels and Meiringspoort (Groot River) populations, both viable but Meiringspoort population vulnerable to impacts form main road running through reserve. Headwaters also not protected. **(Groot)** | 1 | Jordaan& Chakona: Biogaps/Swartberg NR survey 2016 |
| Pseudobarbus tenuis | Swartberg East Nature Reserve | 1016 | Viable | 1000 | Good | 1 | 1000 | Nels and Meiringspoort (Groot River) populations, both viable but Meiringspoort population vulnerable to impacts form main road running through reserve. Headwaters also not protected. (**Nels** - headwaters protected) | 1 | Jordaan& Chakona: Biogaps/Swartberg NR survey 2016 |
| Pseudobarbus tenuis | Paardenberg Nature Reserve | 809 | Viable | 1000 | Fair | 0,5 | 500 | **Kobus River** on Paardenberg NR reserve, need surveys to update extent of P. tenuis presence and this species was not detected downstream during Gamkaberg survey in 2015 (Jordaan and Gouws, CN report. | 2 | Jordaan& Chakona: Biogaps/Swartberg NR survey 2016 |
| Pseudobarbus tenuis | Klein Swartberg Mountain Catchment Area | 535 | Viable | 1000 | Good | 1 | 1000 | Buffelskloof, Kobus, Seweweekspoort and Waterkloof populations viable and protected by instream water abstractions weirs Swartbergs population could be extinct (no fish detected during 2016 survey). **(Buffelskloof**) | 1 | Jordaan& Chakona: Biogaps/Swartberg NR survey 2016 |
| Pseudobarbus tenuis | Klein Swartberg Mountain Catchment Area | 535 | Viable | 1000 | Good | 1 | 1000 | Buffelskloof, Kobus, Seweweekspoort and Waterkloof populations viable and protected by instream water abstractions weirs Swartbergs population could be extinct (no fish detected during 2016 survey). (**Kobus**) | 1 | Jordaan& Chakona: Biogaps/Swartberg NR survey 2016 |
| Pseudobarbus tenuis | Klein Swartberg Mountain Catchment Area | 535 | Viable | 1000 | Good | 1 | 1000 | Buffelskloof, Kobus, Seweweekspoort and Waterkloof populations viable and protected by instream water abstractions weirs Swartbergs population could be extinct (no fish detected during 2016 survey). (**Seweweekspoort**) | 1 | Jordaan& Chakona: Biogaps/Swartberg NR survey 2016 |
| Pseudobarbus tenuis | Klein Swartberg Mountain Catchment Area | 535 | Viable | 1000 | Good | 1 | 1000 | Buffelskloof, Kobus, Seweweekspoort and Waterkloof populations viable and protected by instream water abstractions weirs Swartbergs population could be extinct (no fish detected during 2016 survey). **(Waterkloof**). | 1 | Jordaan& Chakona: Biogaps/Swartberg NR survey 2016 |
| Pseudobarbus tenuis | Kammanassie Mountain Catchment Area | 502 | Viable | 1000 | Fair | 0,5 | 500 | Wilger and Vermaaks rivers. Wilger population viable and well protected but status and viability of Vermaaks population uncertain, need surveys. (**Wilger**) | 1 | Jordaan& Chakona: Biogaps/Swartberg NR survey 2016 |
| Pseudobarbus tenuis | Kammanassie Mountain Catchment Area | 502 | Viable | 1000 | Fair | 0,5 | 500 | Wilger and Vermaaks rivers. Wilger population viable and well protected but status and viability of Vermaaks population uncertain, need surveys. (**Vermaaks**) | 3 | need surveys |
| Pseudobarbus tenuis | Kammanassie Nature Reserve | 503 | Viable | 1000 | Good | 1 | 1000 | Marnewicks, Buffelsklip and Rooi rivers surveyed in 2018, populations viable and protected. Over-abstraction of water outside PA has cut of all invasion pathways. (**Marnewicks**) | 1 | (Jordaan and Chakona, unpublished BioGaps data, 2018) |
| Pseudobarbus tenuis | Kammanassie Nature Reserve | 503 | Viable | 1000 | Good | 1 | 1000 | Marnewicks, Buffelsklip and Rooi rivers surveyed in 2018, populations viable and protected. Over-abstraction of water outside PA has cut of all invasion pathways. (**Buffelsklip**) | 1 | (Jordaan, Chakona & Kadye unpublished BioGaps data, 2018) |
| Pseudobarbus tenuis | Kammanassie Nature Reserve | 503 | Viable | 1000 | Good | 1 | 1000 | Marnewicks, Buffelsklip and Rooi rivers surveyed in 2018, populations viable and protected. Over-abstraction of water outside PA has cut of all invasion pathways. **(Rooi**) | 1 | (Jordaan, Chakona & Kadye unpublished BioGaps data, 2018) |
| Pseudobarbus tenuis | Grootswartberg Mountain Catchment Area | 393 | Viable | 1000 | Fair | 0,5 | 500 | Lower Groot River population viable but open to invasion from Olifants River. Huis River population status unknown and need surveys (Catalog no 81430). Meul River point added manually (Catalog no AC16FL05) (**Groot**) | 1 | Jordaan unpublished data |
| Pseudobarbus tenuis | Grootswartberg Mountain Catchment Area | 393 | Viable | 1000 | Fair | 0,5 | 500 | Lower Groot River population viable but open to invasion from Olifants River. Huis River population status unknown and need surveys (Catalog no 81430). Meul River point added manually (Catalog no AC16FL05) (**Huis**) | 1 | (Jordaan, Chakona & Kadye unpublished BioGaps data, 2018) |
| Pseudobarbus tenuis | Grootswartberg Mountain Catchment Area | 393 | Viable | 1000 | Good | 1 | 1000 | Lower Groot River population viable but open to invasion from Olifants River. Huis River population status unknown and need surveys (Catalog no 81430). Meul River point added manually (Catalog no AC16FL05) (**Meul**) | 1 | (Jordaan, Chakona & Kadye unpublished BioGaps data, 2018) |
| Pseudobarbus tenuis | Groot Swartberg Nature Reserve | 385 | Viable | 1000 | Good | 1 | 1000 | **Waterkloof Rive**r, population status unknow but likely viable. Needs survey to update status of population. | 2 | need surveys to update data |
| Pseudobarbus tenuis | Kleinberg Private Nature Reserve | 537 | Viable | 1000 | Good | 1 | 1000 | Point manually added (new data not in dataset). **Oshoekshang** River population viable and well protected, no alien species present. | 1 | (Jordaan, Chakona & Kadye unpublished BioGaps data, 2018) |
| Pseudobarbus tenuis | Rooiberg Mountain Catchment Area | 1206 | Viable | 1000 | Good | 1 | 1000 | Huis, Bos and Assegaaibos rivers, at least 3 viable and protected populations. (**Huis**) | 1 | Gamkaberg NR survey (Jordaan and Gouws, 2015) |
| Pseudobarbus tenuis | Rooiberg Mountain Catchment Area | 1206 | Viable | 1000 | Good | 1 | 1000 | Huis, Bos and Assegaaibos rivers, at least 3 viable and protected populations. (**Bos**) | 1 | Gamkaberg NR survey (Jordaan and Gouws, 2015) |
| Pseudobarbus tenuis | Rooiberg Mountain Catchment Area | 1206 | Viable | 1000 | Good | 1 | 1000 | Huis, Bos and Assegaaibos rivers, at least 3 viable and protected populations. **(Assegaaibos**) | 1 | Gamkaberg NR survey (Jordaan and Gouws, 2015) |
| Psuedobarbus sp nov 'Forest' | Garden Route Harkerville Section | 339 | Viable | 1000 | Good | 1 | 1000 | Multiple populations present in three discrete cathments (Goukamma, Knysna and Keurbooms) Populations in Millwood Creek, Knysna River including tributaries, Lelievleistroom, Gouna and Diep (Keurbooms), as well as Homtini **(Goukamma**). | 1 | Goukamma NR survey (Jordaan and Gouws, 2016) |
| Psuedobarbus sp nov 'Forest' | Garden Route Harkerville Section | 339 | Viable | 1000 | Good | 1 | 1000 | Multiple populations present in three discrete cathments (Goukamma, Knysna and Keurbooms) Populations in Millwood Creek, Knysna River including tributaries, Lelievleistroom, Gouna and Diep (Keurbooms), as well as Homtin**i (Knysna)** . | 2 | SANParks staff to confirm status of populations |
| Psuedobarbus sp nov 'Forest' | Garden Route Harkerville Section | 339 | Viable | 1000 | Good | 1 | 1000 | Multiple populations present in three discrete cathments (Goukamma, Knysna and Keurbooms) Populations in Millwood Creek, Knysna River including tributaries, Lelievleistroom, Gouna and Diep (Keurbooms), as well as Homtini **(Gouna)**. | 2 | SANParks staff to confirm status of populations |
| Psuedobarbus sp nov 'Forest' | Garden Route Harkerville Section | 339 | Viable | 1000 | Good | 1 | 1000 | Point added manually from Francois Roux ((K50A-03). **Kruis** Tributary of Knysna Rvier) | 2 | SANParks staff to confirm status of populations |
| Psuedobarbus sp nov 'Forest' | Garden Route Harkerville Section | 339 | Viable | 1000 | Poor | 0,1 | 100 | Multiple populations present in three discrete cathments (Goukamma, Knysna and Keurbooms) **Diep**/Keurbooms- poor protection, AIS present and only headwaters of Diep within PA boundary). | 2 | need surveys |
| Psuedobarbus sp nov 'Forest' | Garden route Sedgefield Section | 336 | Viable | 1000 | Fair | 0,5 | 500 | Two populations: Duiwe and Touws Rivers. Possible AIS impacts on Duiwe River, poor fish index based on 2007 RHP report(**Duiwe**) | 2 | SANParks staff to confirm status of populations |
| Psuedobarbus sp nov 'Forest' | Garden route Sedgefield Section | 336 | Viable | 1000 | Good | 1 | 1000 | Two populations: Duiwe and Touws Rivers. Most of Touw River catchment within PA, reference fish fauna based on 2007 RHP report **(Touw)** | 1 | RHP report 2007 |
| Psuedobarbus sp nov 'Forest' | Garden route Tsitsikamma Section | 336 | Viable | 1000 | Fair | 0,5 | 500 | At least three isolated populations, Palmiet, Bloukrans and Groot. **(Palmiet - tributary of Keurbooms**, trout may be present) | 2 | Russel, 2002 |
| Psuedobarbus sp nov 'Forest' | Garden route Tsitsikamma Section | 339 | Viable | 1000 | Good | 1 | 1000 | At least three isolated populations, Palmiet, Bloukrans and Groot.**(Bloukrans).**  Likely well protected as whole river is within PA. | 2 | Russel, 2002 |
| Psuedobarbus sp nov 'Forest' | Garden route Tsitsikamma Section | 339 | Viable | 1000 | Good | 1 | 1000 | At least three isolated populations, Palmiet, Bloukrans and Groot. **(Groot)** | 2 | Russel, 2002 |
| Psuedobarbus sp nov 'Forest' | Witfontein Nature Reserve | 1175 | Viable | 1000 | Good | 1 | 1000 | PA spans three discrete catchments: Touws, Kaaimans and Gwaing. Intersect point on Touws River, population expected to be viable based on RLA, to be confirmed by surveys. PA only on one side of river, but other side is state forest swo protection from land use impacts. **(Touw)** | 2 | 2007 RHP report |
| Psuedobarbus sp nov 'Forest' | Witfontein Nature Reserve | 1175 | Viable | 1000 | Good | 1 | 1000 | PA spans three discrete catchments: Touws, Kaaimans and Gwaing. **(Gwaiing** - upper Gawiing has natural fish fauna based on 2007 RHP report). No point for upper Gwaiing - inferred presence from RHP report | 3 | 2007 RHP report |
| Psuedobarbus sp nov 'Forest' | Witfontein Nature Reserve | 1175 | Viable | 1000 | Good | 1 | 1000 | PA spans three discrete catchments: Touws, Kaaimans and Gwaing. Intersect point on Touws River, population expected to be viable based on RLA, to be confirmed by surveys. PA only on one side of river, so limited protection from land use impacts. (Kaaimans - upper **Kaaimans** has natural fish fauna based on 2007 RHP report. Headwaters protected). No point for Kaaimans - inferred presence from RHP report | 3 | 2007 RHP report |
| Pseudobrbus afer | Settlers Park Local Authority Nature Reserve | 960 | Viable | 1000 | Poor | 0,1 | 100 | PA located in the middle of Port Elizabeth on **Baakens River,** population viable but status on PA unknown. PA not effective against urban modification, alien fish and pollution (RLA assessment) | 1 | 2017 RLA; Ellender et al., 2013 |
| Pseudobrbus afer | Baviaanskloof Nature Reserve (Groendal) | 1244 | Viable | 1000 | Fair | 0,5 | 500 | At least two populations in Groendal Nature reserve, Fernkloof and Waterkloof Rivers. Both viable but open to invasion from Swartkops River. (**Fernkloof**) | 1 | 2017 RLA; Ellender et al., 2013 |
| Pseudobrbus afer | Baviaanskloof Nature Reserve (Groendal) | 1245 | Viable | 1000 | Fair | 0,5 | 500 | At least two populations in Groendal Nature reserve, Fernkloof and Waterkloof Rivers. Both viable but open to invasion from Swartkops River. **(Waterkloof**) | 1 | 2017 RLA; Ellender et al., 2013 |
| Pseudobrbus afer | Addo National Park | 7 | Viable | 1000 | Fair | 0,5 | 500 | At least three populations present, Groot Uie, Klein Uie, Wit). Point on Kabougas Rvier outside PA (Cat no 134065), not sure whether to include. Confirm with Albert and Bruce E. (**Wit)** | 1 | 2017 RLA; Ellender et al., 2013 |
| Pseudobrbus afer | Addo National Park | 7 | Viable | 1000 | Fair | 0,5 | 500 | At least three populations present, Groot Uie, Klein Uie, Wit). Point on Kabougas Rvier outside PA (Cat no 134065), not sure whether to include. Confirm with Albert and Bruce E. (**Groot Uie)** | 2 | Ellender et al., 2014; 2017 RLA |
| Pseudobrbus afer | Addo National Park | 7 | Viable | 1000 | Fair | 0,5 | 500 | At least three populations present, Groot Uie, Klein Uie, Wit). Point on Kabougas Rvier outside PA (Cat no 134065), not sure whether to include. Confirm with Albert and Bruce E. **(Klein Uie**) | 2 | Ellender et al., 2014; RLA |
| Pseudobarbus tenuis "Keurbooms' | Garden Route National Park - Tsitsikamma section | 336 | Viable | 1000 | Fair | 0,5 | 500 | At least two viable populations present (Palmiet and Dwars Rivers), extent of alien fish invasion to be determined. (Palmiet) | 2 | Need surveys |
| Pseudobarbus tenuis "Keurbooms' | Garden Route National Park - Tsitsikamma section | 336 | Viable | 1000 | Fair | 0,5 | 500 | At least two viable populations present (Palmiet and Dwars Rivers), extent of alien fish invasion to be determined. (Dwars) | 2 | Need surveys |
| Pseudobarbus tenuis "Keurbooms' | Garden Route National Park - Harkerville section | 336 | Viable | 1000 | Fair | 0,5 | 500 | Diep River population - possible affected by alien fish, river open to invasion from Keurbooms mainstem | 2 | Need surveys |
| Pseudobarbus senticeps | Kromme Riviers Hoogte Nature Reserve | 571 | Viable | 1000 | Fair | 0,5 | 500 | Point added manually - ES/HR 2000-05-06 | 2 | Need surveys |
| Pseudobarbus swartzi | Baviaanskloof Nature Reserve | 1244 | Viable | 1000 | Good | 1 | 1000 | Four populations on PA, three intersect (Wit, Kausenkei and Dwars). One population added manuallynamely Diep Rvier, locality point AC16AL07). (Upper Dwars) | 2 | Need surveys |
| Pseudobarbus swartzi | Baviaanskloof Nature Reserve | 1244 | Viable | 1000 | Good | 1 | 1000 | Four populations on PA, three intersect (Wit, Kausenkei and Dwars). One population added manuallynamely Diep Rvier, locality point AC16AL07). (Diep) | 2 | Need surveys |
| Pseudobarbus swartzi | Baviaanskloof Nature Reserve | 1244 | Viable | 1000 | Good | 1 | 1000 | Four populations on PA, three intersect (Wit, Kousenkei and Dwars). One population added manuallynamely Diep Rvier, locality point AC16AL07). (Wit) | 2 | Need surveys |
| Pseudobarbus swartzi | Baviaanskloof Nature Reserve | 1244 | Viable | 1000 | Poor | 0,1 | 100 | Four populations on PA, three intersect (Wit, Kausenkei and Dwars). One population added manuallynamely Diep Rvier, locality point AC16AL07). (Kousenkei: headwaters not protected, close to Kouga dam which is potnetial invasion source) | 2 | Surveys/Need SAIAB input |
| Pseudobarbus swartzi | Baviaanskloof Nature Reserve | 1244 | Viable | 1000 | Fair | 0,5 | 500 | Louerie Rvier upstream of Dam, protection fair as dam may be invasion source? | 2 | Surveys/Need SAIAB input |
| Galaxias sp nov 'Goukou' | Spioenkop Nature Reserve (Langeberg) | 992 | Viable | 1000 | Good | 1 | 1000 | Point added manually on upper **Goukou River** (Catalog no AC09B01) | 1 | RLA |
